# Supplementary material for: Structural analysis of the unmutated ancestor of the HIV-1 envelope V2 region antibody CH58 isolated from an RV144 vaccine efficacy trial vaccinee
Source: PubMed Central journal article supplement — eBioMedicine. 2015 Jun 20;2(7):713–22. doi: 10.1016/j.ebiom.2015.06.016 (PMC4534707; doi:10.1016/j.ebiom.2015.06.016), 2015-06-20
Supplement: mmc1.pdf [file mmc1.pdf]

## Supplementary material

### **Structural Analysis of the Unmutated Ancestor of the HIV-1 Envelope V2 Region Antibody CH58 Isolated from an RV144 Vaccine Efficacy Trial Vaccinee**

Nathan I Nicely<sup>1</sup>, Kevin Wiehe<sup>1</sup>, Thomas B. Kepler<sup>2</sup>, Frederick H. Jaeger<sup>1</sup>, S. Moses Dennison<sup>1</sup>, Supachai Rerks-Ngarm<sup>3</sup>, Sorachai Nitayaphan<sup>4</sup>, Punnee Pitisuttithum<sup>5</sup>, Jaranit Kaewkungwal<sup>5</sup>, Merlin L. Robb<sup>6</sup>, Robert J. O'Connell<sup>4</sup>, Nelson L. Michael<sup>7</sup>, Jerome H. Kim<sup>7</sup>, Hua-Xin Liao<sup>1</sup>, S. Munir Alam<sup>1</sup>, Kwan-Ki Hwang<sup>1</sup>, Mattia Bonsignori<sup>1</sup>, and Barton F. Haynes<sup>1</sup>

<sup>1</sup>Duke Human Vaccine Institute, Duke University School of Medicine, Durham, North Carolina, USA

<sup>2</sup>Boston University Department of Microbiology, Boston, Massachusetts, USA

<sup>3</sup>Ministry of Public Health, Nonthaburi, Thailand

<sup>4</sup>Armed Forces Research Institute of Medical Sciences, Thailand

<sup>5</sup>Mahidol University, Bangkok, Thailand

<sup>6</sup>Henry Jackson Foundation HIV Program, US Military HIV Research Program, Bethesda, MD, USA

<sup>7</sup>US Military HIV Research Program (MHRP), Walter Reed Army Institute of Research, Silver Spring, MD, USA

The opinions herein are those of the authors and should not be construed as representing the official views of the Departments of Defense or the Army.

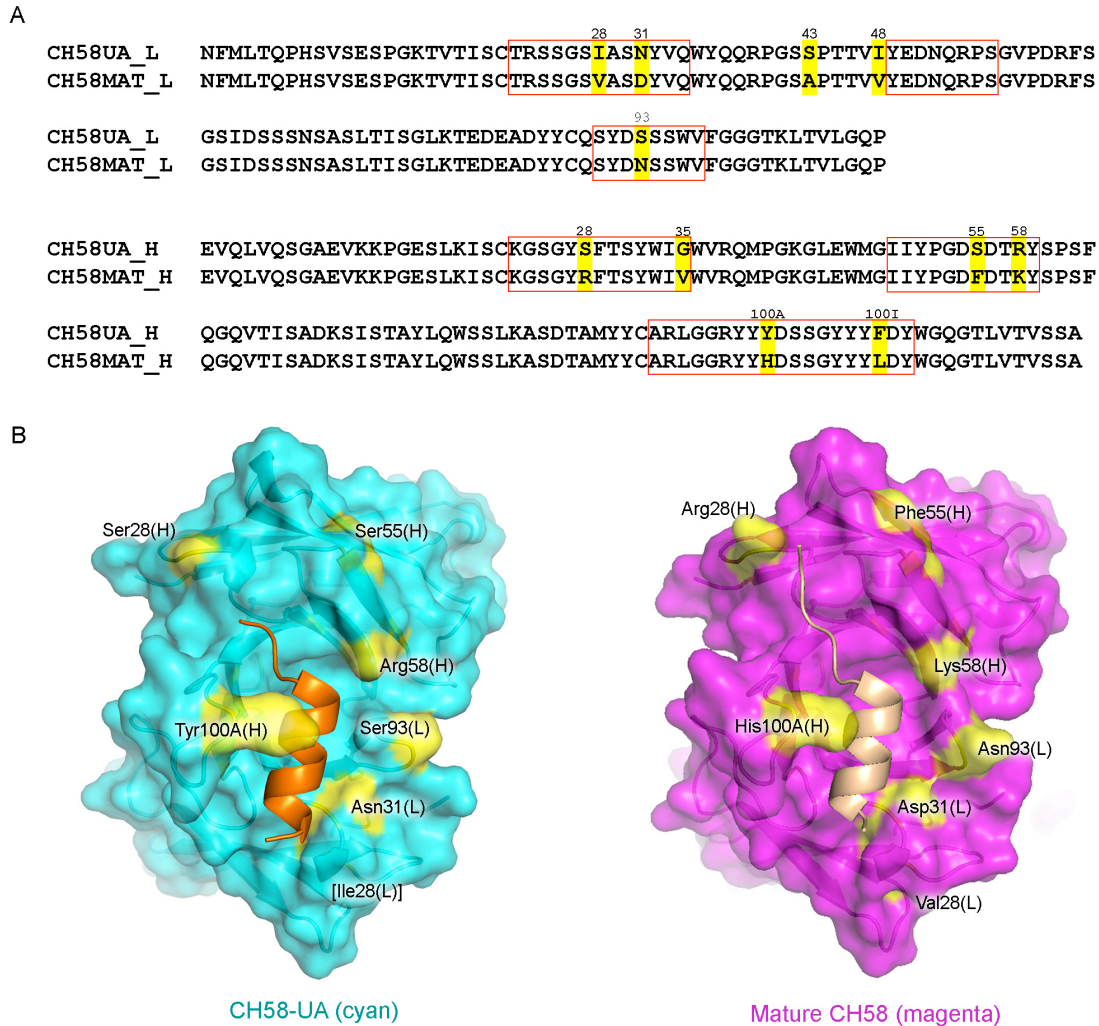

**Figure S1** Sequence alignments and locations of mutations in the mature CH58 antibody (“CH58MAT”) and its inferred unmutated ancestor (“CH58UA”). A) The light and Fab heavy chains of the CH58-UA and mature CH58 antibodies have a total of 11 mutations (highlighted in yellow and numbered) that occur with affinity maturation. Nine of those mutations occurred in complementarity determining regions (boxed). B) Surface representations of the structures of CH58-UA and mature CH58 (Liao et al., 2013) Fabs with gp120 V2 peptides show that some but not all the mutations occur within the antibody paratope. Residues visible on the surface of the Fabs are highlighted in yellow and labeled.

**Table S1** Summary data on BLI binding experiments between CH58-UA Fab and wild-type V2 peptide gp120<sub>165-182</sub>.

|       | 1                                             | 2                                             | avg                                           |
|-------|-----------------------------------------------|-----------------------------------------------|-----------------------------------------------|
| $k_a$ | $1.8 \times 10^4 \text{ M}^{-1}\text{s}^{-1}$ | $1.4 \times 10^4 \text{ M}^{-1}\text{s}^{-1}$ | $1.6 \times 10^4 \text{ M}^{-1}\text{s}^{-1}$ |
| $k_d$ | $1.6 \times 10^{-1} \text{ s}^{-1}$           | $1.8 \times 10^{-1} \text{ s}^{-1}$           | $1.7 \times 10^{-1} \text{ s}^{-1}$           |
| $K_D$ | 9.0 $\mu\text{M}$                             | 12.9 $\mu\text{M}$                            | 11.0 $\mu\text{M}$                            |

**Table S2** Summary data on BLI binding experiments between mature CH58 Fab and wild-type V2 peptide gp120<sub>165-182</sub>.

|       | 1                                             | 2                                             | 3                                             | avg                                           |
|-------|-----------------------------------------------|-----------------------------------------------|-----------------------------------------------|-----------------------------------------------|
| $k_a$ | $6.5 \times 10^4 \text{ M}^{-1}\text{s}^{-1}$ | $6.6 \times 10^4 \text{ M}^{-1}\text{s}^{-1}$ | $6.7 \times 10^4 \text{ M}^{-1}\text{s}^{-1}$ | $6.6 \times 10^4 \text{ M}^{-1}\text{s}^{-1}$ |
| $k_d$ | $2.7 \times 10^{-4} \text{ s}^{-1}$           | $3.1 \times 10^{-4} \text{ s}^{-1}$           | $3.3 \times 10^{-4} \text{ s}^{-1}$           | $3.0 \times 10^{-4} \text{ s}^{-1}$           |
| $K_D$ | 4.2 nM                                        | 4.7 nM                                        | 4.9 nM                                        | 4.6 nM                                        |

**Table S3** Summary data on BLI binding experiments between CH58-UA Fab and V2 peptide gp120<sub>165-182</sub> L179A/I181A.

|       | 1                                             | 2                                             | avg                                           |
|-------|-----------------------------------------------|-----------------------------------------------|-----------------------------------------------|
| $k_a$ | $7.2 \times 10^4 \text{ M}^{-1}\text{s}^{-1}$ | $9.5 \times 10^4 \text{ M}^{-1}\text{s}^{-1}$ | $8.4 \times 10^4 \text{ M}^{-1}\text{s}^{-1}$ |
| $k_d$ | $7.4 \times 10^{-2} \text{ s}^{-1}$           | $6.9 \times 10^{-2} \text{ s}^{-1}$           | $7.2 \times 10^{-2} \text{ s}^{-1}$           |
| $K_D$ | 1.0 $\mu\text{M}$                             | 0.7 $\mu\text{M}$                             | 0.9 $\mu\text{M}$                             |

Reference:

Liao, H.X., Bonsignori, M., Alam, S.M., McLellan, J.S., Tomaras, G.D., Moody, M.A., Kozink, D.M., Hwang, K.K., Chen, X., Tsao, C.Y., *et al.* (2013). Vaccine induction of antibodies against a structurally heterogeneous site of immune pressure within HIV-1 envelope protein variable regions 1 and 2. *Immunity* 38, 176-186.
